# Supplementary material
Source: bioRxiv or medRxiv preprint supplement (https://www.biorxiv.org/highwire/filestream/11670/field_highwire_adjunct_files/0/040386-1.pdf)

# Zika Ensemble Model under Current Climate Conditions

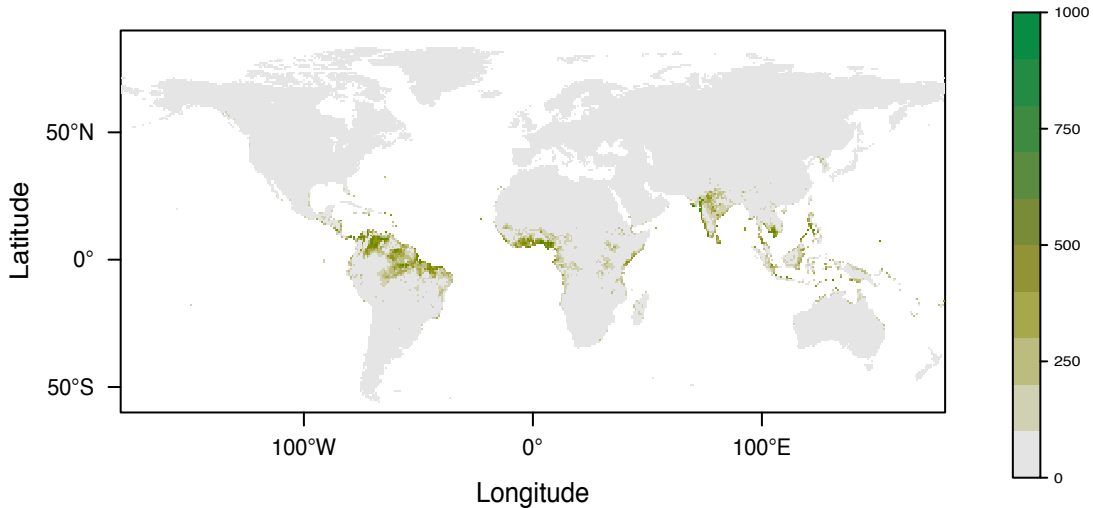

Supplement: Supplementary file [file 040386-1.pdf]
